# Supplementary material
Source: MDPI journal article supplement (https://www.mdpi.com/2073-4344/9/2/121)
Supplement: s1 [file s1]

# Supplementary Material: Nanosheet MFI zeolites for gas phase glycerol dehydration to acrolein

Jianfeng Shan<sup>1,2,†</sup>, Zhikai Li<sup>1,†</sup>, Shanhui Zhu<sup>1,\*</sup>, Huan Liu<sup>1,2</sup>, Junfen Li<sup>1</sup>, Jianguo Wang<sup>1</sup>, and Weibin Fan<sup>1,\*</sup>

## S1. Experimental details

The organic surfactant  $C_{18-6-6}Br_2$  was synthesized as follows: 0.03 mol 1-bromodocosane (TCI) and 0.30 mol  $N,N,N',N'$ -tetramethyl-1,6-diaminohexane (Aldrich) were dissolved in 300 mL toluene/acetonitrile mixture (1:1 volume ratio) and reacted under electromagnetic stirring at 70 °C for 10 h. After cooling to room temperature, the resulting mixture was filtered, washed with diethylether, and dried at 60 °C in a vacuum oven. The obtained product (0.03 mol) was mixed with 100 mL acetonitrile, and then 9.9 g (0.06 mol) 1-bromohexane (Aldrich) was added with 10 h reflux. After cooling to room temperature, the product was filtered, washed with diethylether, and dried in a vacuum oven at 60 °C. Subsequently, the nanosheet MFI zeolites were synthesized under hydrothermal conditions using the above template. Deionized water,  $H_2SO_4$ , NaOH,  $Al_2(SO_4)_3 \cdot 18H_2O$ ,  $C_{18-6-6}Br_2$  and tetraethylorthosilicate (TEOS) were mixed to get a gel with a composition of 30  $Na_2O$ : x  $Al_2O_3$ : 100  $SiO_2$ : 10  $C_{18-6-6}Br_2$ : 18  $H_2SO_4$ : 4,000  $H_2O$ . The crystallization process was performed in a Teflon-lined stainless-steel autoclave at 150 °C for 5 days under autogenous pressure with the autoclave setting to tumbling at 15 r.p.m [1,2]. After that, the solid products were separated by centrifugation, washed 3 times with deionized water and dried at 100 °C overnight. To remove the template, the obtained zeolites were calcined in air at 550 °C for 5 h. Nanosheet MFI zeolites with Si/Al molar ratios as 30, 50, 100 (the atomic ratio of silicon to aluminum in the synthesis gel) were synthesized by changing the Al content as  $x = 1.65, 1$  and  $0.5$ . For the conventional MFI zeolites, sodium aluminate ( $NaAlO_2$ ), NaOH, TPAOH and silica sol (40 wt.%  $SiO_2$ , 4 wt.%  $Na_2O$ ) were added into deionized water in sequence with constant stirring, and then a certain amount of silicalite-1 seeds were added. The obtained gels were transferred into Teflon-lined stainless-steel autoclaves and crystallized at 170 °C for 48 h. The solid products were then separated, washed, dried and calcined with the same procedure in the synthesis of nanosheet MFI zeolites. To get H-form zeolites, all the zeolites obtained above were ion-exchanged with 1 M  $NH_4NO_3$  solution at 80 °C two times over 8 h. After ion-exchange, the zeolites were washed and dried, followed by calcination at 550 °C for 5 h. Before use, H-form zeolite powders were pressed, crushed and sieved to 20–40 mesh.

## S2. Figures and Tables

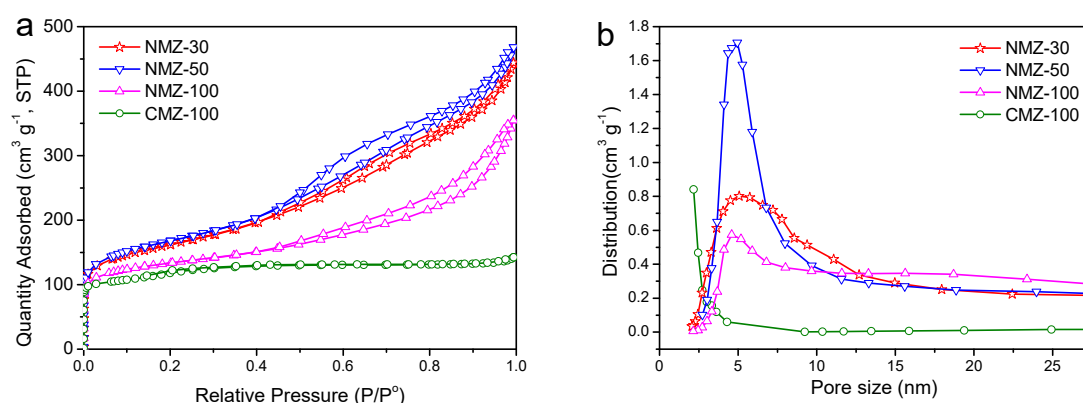

**Figure S1.** (a)  $N_2$  adsorption-desorption isotherms at  $-195.8$  °C and (b) pore size distribution.

**Table S1.** Overall acidic properties of different zeolite catalysts.

| Sample  | Acidity by NH <sub>3</sub> -TPD <sup>a</sup> (μmol g <sup>-1</sup> ) |      |        | Acidity by Py-IR (μmol g <sup>-1</sup> ) |          |       |      |
|---------|----------------------------------------------------------------------|------|--------|------------------------------------------|----------|-------|------|
|         | total                                                                | weak | strong | total                                    | Brønsted | Lewis | B/L  |
| NMZ-30  | 412                                                                  | 215  | 197    | 384                                      | 238      | 146   | 1.63 |
| NMZ-50  | 279                                                                  | 97   | 182    | 260                                      | 182      | 78    | 2.33 |
| NMZ-100 | 178                                                                  | 44   | 134    | 116                                      | 83       | 33    | 2.51 |
| CMZ-50  | 295                                                                  | 109  | 186    | 258                                      | 179      | 79    | 2.27 |
| CMZ-100 | 189                                                                  | 50   | 139    | 104                                      | 74       | 30    | 2.47 |
| CMZ-150 | 148                                                                  | 35   | 113    | 72                                       | 52       | 20    | 2.60 |

<sup>a</sup>Quantities of weak and strong acid sites determined at peaks in 120–250 and 250–550 °C by NH<sub>3</sub>-TPD, respectively.

**Table S2.** Summary of the infrared band assignments.

| Mode             | Frequency (cm <sup>-1</sup> ) | Adsorbed species    | Ref. |
|------------------|-------------------------------|---------------------|------|
| νC=O             | 1728                          | Acrolein and acetol | 3,4  |
| νC=C             | 1671                          | Acrolein            | 3,4  |
| δCH <sub>2</sub> | 1462                          | Glycerol            | 5    |
| δOH              | 1410                          | Glycerol            | 5    |
| δCH              | 1345                          | Glycerol            | 5    |

**Table S3.** Coke content of used catalysts and corresponding coke deposition rate.

| Sample  | TOS (h) | Coke content <sup>a</sup> (%) | Coke deposition rate <sup>b</sup>                                   |
|---------|---------|-------------------------------|---------------------------------------------------------------------|
|         |         |                               | (g <sub>coke</sub> g <sub>cat</sub> <sup>-1</sup> h <sup>-1</sup> ) |
| NMZ-30  | 24      | 28.8                          | 16.8*10 <sup>-3</sup>                                               |
| NMZ-100 | 24      | 17.4                          | 8.8*10 <sup>-3</sup>                                                |
| CMZ-100 | 10      | 10.2                          | 11.4*10 <sup>-3</sup>                                               |
| CMZ-150 | 9       | 8.0                           | 9.7*10 <sup>-3</sup>                                                |

<sup>a</sup>Coke contents were calculated from TG profiles of used catalysts (the catalysts were collected after glycerol conversion decreased to about 80%).

<sup>b</sup>Coke deposition rate was calculated with the following formula:

$$\text{Coke deposition rate} = 1/(1 - \text{Coke content}) \times \text{Coke content} / \text{TOS}$$

## References

1. Choi, M.; Na, K.; Kim, J.; Sakamoto, Y.; Terasaki, O.; Ryoo, R. Stable single-unit-cell nanosheets of zeolite MFI as active and long-lived catalysts. *Nature* **2009**, *461*, 246-249.
2. Na, K.; Choi, M.; Park, W.; Sakamoto, Y.; Terasaki, O.; Ryoo, R. Pillared MFI zeolite nanosheets of a single-unit-cell thickness. *J. Am. Chem. Soc.* **2010**, *132*, 4169-4177.
3. Yi, X.D.; Zhang, X.B.; Weng, W.Z.; Wan, H.L. Studies on the reaction pathways for the selective oxidation of propane to acrolein over MoPO/SiO<sub>2</sub> catalyst by IR spectroscopy. *J. Mol. Catal. A: Chem.* **2007**, *277*, 202-209.
4. Ravenelle, R.M.; Copeland, J.R.; Pelt, A.H.V.; Crittenden, J.C.; Sievers, C. Stability of Pt/gamma-Al<sub>2</sub>O<sub>3</sub> Catalysts in Model Biomass Solutions. *Top Catal.* **2012**, *55*, 162-174.
5. Copeland, J.R.; Foo, G.S.; Harrison, L.A.; Sievers, C. In situ ATR-IR study on aqueous phase reforming reactions of glycerol over a Pt/gamma-Al<sub>2</sub>O<sub>3</sub> catalyst. *Catal. Today* **2013**, *205*, 49-59.

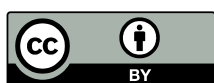

© 2018 by the authors. Submitted for possible open access publication under the terms and conditions of the Creative Commons Attribution (CC BY) license (<http://creativecommons.org/licenses/by/4.0/>).
